# Supplementary material for: Impact of COVID-19 pandemic on screening and diagnosis of patients with prostate cancer: a systematic review protocol
Source: HighWire-hosted journal article supplement (doi:10.1136/bmjopen-2022-063748), 2022-08-01
Supplement: bmjopen-2022-063748supp001_data_supplement.pdf [file bmjopen-2022-063748supp001_data_supplement.pdf]

Table S1. Syntax of electronic databases

| <b>PubMed/MEDLINE</b>                                                                                                                                                                                                                                                                                                                                                                                                                                                                                                                                                                                                                                                                                                                                                                                                                                                                                                                                                                                                                                                                                                                                                                                                                                                                                                                                                                                                                                                                                           |
|-----------------------------------------------------------------------------------------------------------------------------------------------------------------------------------------------------------------------------------------------------------------------------------------------------------------------------------------------------------------------------------------------------------------------------------------------------------------------------------------------------------------------------------------------------------------------------------------------------------------------------------------------------------------------------------------------------------------------------------------------------------------------------------------------------------------------------------------------------------------------------------------------------------------------------------------------------------------------------------------------------------------------------------------------------------------------------------------------------------------------------------------------------------------------------------------------------------------------------------------------------------------------------------------------------------------------------------------------------------------------------------------------------------------------------------------------------------------------------------------------------------------|
| <p>(“COVID 19”[tiab] OR “COVID-19 Virus Disease*”[tiab] OR “COVID 19 Virus Disease” [tiab] OR (Disease[tiab] AND COVID-19 Virus[tiab]) OR (Virus Disease[tiab] AND COVID-19[tiab]) OR “COVID-19 Virus Infection*”[tiab] OR “COVID 19 Virus Infection” [tiab] OR (Infection[tiab] AND COVID-19 Virus[tiab]) OR (Virus Infection[tiab] AND COVID-19[tiab]) OR “2019-nCoV Infection*”[tiab] OR “2019 nCoV Infection” [tiab] OR (Infection[tiab] AND 2019-nCoV[tiab]) OR “Coronavirus Disease-19” [tiab] OR “Coronavirus Disease 19” [tiab] OR “2019 Novel Coronavirus Disease” [tiab] OR “2019 Novel Coronavirus Infection” [tiab] OR “2019-nCoV Disease*”[tiab] OR “2019 nCoV Disease” [tiab] OR (Disease[tiab] AND 2019-nCoV[tiab]) OR “COVID19” [tiab] OR “Coronavirus Disease 2019” [tiab] OR (Disease 2019[tiab] AND Coronavirus[tiab]) OR “SARS Coronavirus 2 Infection” [tiab] OR “SARS-CoV-2 Infection” [tiab] OR (Infection[tiab] AND SARS-CoV-2[tiab]) OR “SARS CoV 2 Infection” [tiab] OR “SARS-CoV-2 Infections” [tiab] OR “COVID-19 Pandemic*”[tiab] OR “COVID 19 Pandemic” [tiab] OR (Pandemic[tiab] AND COVID-19[tiab]))</p> <p>AND</p> <p>(“Prostate Neoplasm*”[tiab] OR (Neoplasm*[tiab] AND Prostate[tiab]) OR (Neoplasm*[tiab] AND Prostatic[tiab]) OR “Prostatic Neoplasm” [tiab] OR “Prostate Cancer*”[tiab] OR (Cancer*[tiab] AND Prostate[tiab]) OR “Cancer of the Prostate” [tiab] OR “Prostatic Cancer*”[tiab] OR (Cancer*[tiab] AND Prostatic[tiab]) OR “Cancer of Prostate” [tiab])</p> |
| <b>Embase</b>                                                                                                                                                                                                                                                                                                                                                                                                                                                                                                                                                                                                                                                                                                                                                                                                                                                                                                                                                                                                                                                                                                                                                                                                                                                                                                                                                                                                                                                                                                   |
| <p>(‘COVID 19’:ti,ab OR ‘COVID-19 Virus Disease*’:ti,ab OR ‘COVID 19 Virus Disease’:ti,ab OR (Disease:ti,ab AND COVID-19 Virus:ti,ab) OR (Virus Disease:ti,ab AND COVID-19:ti,ab) OR ‘COVID-19 Virus Infection*’:ti,ab OR ‘COVID 19 Virus Infection’:ti,ab OR (Infection:ti,ab AND COVID-19 Virus:ti,ab) OR (Virus Infection:ti,ab AND COVID-19:ti,ab) OR ‘2019-nCoV Infection*’:ti,ab OR ‘2019 nCoV Infection’:ti,ab OR (Infection:ti,ab AND 2019-nCoV:ti,ab) OR ‘Coronavirus Disease-19’:ti,ab OR ‘Coronavirus Disease 19’:ti,ab OR ‘2019 Novel Coronavirus Disease’:ti,ab OR ‘2019 Novel Coronavirus Infection’:ti,ab OR ‘2019-nCoV Disease*’:ti,ab OR ‘2019 nCoV Disease’:ti,ab OR (Disease:ti,ab AND 2019-nCoV:ti,ab) OR ‘COVID19’:ti,ab OR ‘Coronavirus Disease 2019’:ti,ab OR (Disease 2019:ti,ab AND Coronavirus:ti,ab) OR ‘SARS Coronavirus 2 Infection’:ti,ab OR ‘SARS-CoV-2 Infection’:ti,ab OR (Infection:ti,ab AND SARS-CoV-2:ti,ab) OR ‘SARS CoV 2 Infection’:ti,ab OR ‘SARS-CoV-2 Infections’:ti,ab OR ‘COVID-19 Pandemic*’:ti,ab OR ‘COVID 19 Pandemic’:ti,ab OR (Pandemic:ti,ab AND COVID-19:ti,ab))</p> <p>AND</p> <p>(‘Prostate Neoplasm*’:ti,ab OR (Neoplasm*:ti,ab AND Prostate:ti,ab) OR (Neoplasm*:ti,ab AND Prostatic:ti,ab) OR ‘Prostatic Neoplasm’:ti,ab OR ‘Prostate Cancer*’:ti,ab OR (Cancer*:ti,ab AND Prostate:ti,ab) OR ‘Cancer of the Prostate’:ti,ab OR ‘Prostatic Cancer*’:ti,ab OR (Cancer*:ti,ab AND Prostatic:ti,ab) OR ‘Cancer of Prostate’:ti,ab)</p>                   |

### scopus

(TITLE-ABS-KEY(("COVID 19" OR "COVID-19 Virus Disease\*" OR "COVID 19 Virus Disease" OR (Disease, AND COVID-19 Virus) OR (Virus Disease AND COVID-19) OR "COVID-19 Virus Infection\*" OR "COVID 19 Virus Infection" OR (Infection AND COVID-19 Virus) OR (Virus Infection AND COVID-19) OR "2019-nCoV Infection\*" OR "2019 nCoV Infection" OR (Infection AND 2019-nCoV) OR "Coronavirus Disease-19" OR "Coronavirus Disease 19" OR "2019 Novel Coronavirus Disease" OR "2019 Novel Coronavirus Infection" OR "2019-nCoV Disease\*" OR "2019 nCoV Disease" OR (Disease AND 2019-nCoV) OR "COVID19" OR "Coronavirus Disease 2019" OR (Disease 2019 AND Coronavirus) OR "SARS Coronavirus 2 Infection" OR "SARS-CoV-2 Infection" OR (Infection AND SARS-CoV-2) OR "SARS CoV 2 Infection" OR "SARS-CoV-2 Infections" OR "COVID-19 Pandemic\*" OR "COVID 19 Pandemic" OR (Pandemic AND COVID-19)))

AND

(TITLE-ABS-KEY(("Prostate Neoplasm\*" OR (Neoplasm\* AND Prostate) OR (Neoplasm\* AND Prostatic) OR "Prostatic Neoplasm" OR "Prostate Cancer\*" OR (Cancer\* AND Prostate) OR "Cancer of the Prostate" OR "Prostatic Cancer\*" OR (Cancer\* AND Prostatic) OR "Cancer of Prostate"))

### WOS

(TS=("COVID 19" OR "COVID-19 Virus Disease\*" OR "COVID 19 Virus Disease" OR (Disease, AND COVID-19 Virus) OR (Virus Disease AND COVID-19) OR "COVID-19 Virus Infection\*" OR "COVID 19 Virus Infection" OR (Infection AND COVID-19 Virus) OR (Virus Infection AND COVID-19) OR "2019-nCoV Infection\*" OR "2019 nCoV Infection" OR (Infection AND 2019-nCoV) OR "Coronavirus Disease-19" OR "Coronavirus Disease 19" OR "2019 Novel Coronavirus Disease" OR "2019 Novel Coronavirus Infection" OR "2019-nCoV Disease\*" OR "2019 nCoV Disease" OR (Disease AND 2019-nCoV) OR "COVID19" OR "Coronavirus Disease 2019" OR (Disease 2019 AND Coronavirus) OR "SARS Coronavirus 2 Infection" OR "SARS-CoV-2 Infection" OR (Infection AND SARS-CoV-2) OR "SARS CoV 2 Infection" OR "SARS-CoV-2 Infections" OR "COVID-19 Pandemic\*" OR "COVID 19 Pandemic" OR (Pandemic AND COVID-19)))

AND

(TS=("Prostate Neoplasm\*" OR (Neoplasm\* AND Prostate) OR (Neoplasm\* AND Prostatic) OR "Prostatic Neoplasm" OR "Prostate Cancer\*" OR (Cancer\* AND Prostate) OR "Cancer of the Prostate" OR "Prostatic Cancer\*" OR (Cancer\* AND Prostatic) OR "Cancer of Prostate"))

### ProQuest

(AB, TI(("COVID 19" OR "COVID-19 Virus Disease\*" OR "COVID 19 Virus Disease" OR (Disease, AND COVID-19 Virus) OR (Virus Disease AND COVID-19) OR "COVID-19 Virus Infection\*" OR "COVID 19 Virus Infection" OR (Infection AND COVID-19 Virus) OR (Virus Infection AND COVID-19) OR "2019-nCoV Infection\*" OR "2019 nCoV Infection" OR (Infection AND 2019-nCoV) OR "Coronavirus Disease-19" OR "Coronavirus Disease 19" OR "2019 Novel Coronavirus Disease" OR "2019 Novel Coronavirus Infection" OR "2019-nCoV Disease\*" OR "2019 nCoV Disease" OR (Disease AND 2019-nCoV) OR "COVID19" OR "Coronavirus Disease 2019" OR (Disease 2019 AND Coronavirus) OR "SARS Coronavirus 2 Infection" OR "SARS-CoV-2 Infection" OR (Infection AND SARS-CoV-2) OR "SARS CoV 2

Infection” OR “SARS-CoV-2 Infections” OR “COVID-19 Pandemic\*” OR “COVID 19 Pandemic” OR (Pandemic AND COVID-19))

AND (AB, TI (“Prostate Neoplasm\*” OR (Neoplasm\* AND Prostate) OR (Neoplasm\* AND Prostatic) OR “Prostatic Neoplasm” OR “Prostate Cancer\*” OR (Cancer\* AND Prostate) OR “Cancer of the Prostate” OR “Prostatic Cancer\*” OR (Cancer\* AND Prostatic) OR “Cancer of Prostate”))
